# Supplementary material for: Synthesis, characterization, and in vitro anti-cholinesterase screening of novel indole amines
Source: Royal Society of Chemistry journal article supplement (doi:10.1039/d2ra05105b), 2023-01-01
Supplement: d2ra05105b1.pdf [file d2ra05105b1.pdf]

ARTICLE

## Synthesis, Characterization and *in vitro* anti-Cholinesterase Screening of Novel Indole Amines

Received 00th January 20xx,  
Accepted 00th January 20xx

DOI: 10.1039/x0xx00000x

Humaira Yasmeen Gondal<sup>a</sup>, Sobia Tariq<sup>a</sup>, Shahzaib Akhter<sup>a</sup>, Abdul Rauf Raza<sup>\*a</sup>, Muhammad Fayyaz ur Rehman<sup>\*a</sup>, and Syeda Laila Rubab<sup>b</sup>

The present study involved targeted synthesis and characterization of novel indole amines with anti-acetylcholinesterase profiling. A series of proposed indole amines was virtually screened against human acetylcholinesterase. A few indole amines (**26**, **30** and **31**) showing strong enzyme binding in the *in silico* studies, were synthesized in the laboratory and characterized with spectroscopic (IR, UV, NMR, SC XRD) and spectrometric (EIMS, HR EIMS) methods. The indole amine **26** was crystallized from EtOH and analyzed with SC-XRD. These ligands were found to interact with PAS site in the enzyme and their binding may disrupt the activity. The *in vitro* acetylcholinesterase inhibition studies exhibits that indole amines (**30** and **31**) show comparable IC<sub>50</sub> values (4.28 and 4.66  $\mu$ M, respectively) to galantamine (4.15  $\mu$ M) and may be studied further as cost-effective acetylcholinesterase inhibitors.

**Keywords:** Indoles, Indole amines, Anti-cholinesterase potential, Alzheimer's disease, Inhibitory action

<sup>a</sup> Institute of Chemistry, Ibn e Sina Block, University of Sargodha, Sargodha-40100 (Pakistan) E-Mail: [rauf.raza@uos.edu.pk](mailto:rauf.raza@uos.edu.pk) (A.R.R.); [humaira.yasmeen@uos.edu.pk](mailto:humaira.yasmeen@uos.edu.pk) (H.Y.G.); [sobiatariq66@gmail.com](mailto:sobiatariq66@gmail.com) (S.T.); [shahzaibakhter740@gmail.com](mailto:shahzaibakhter740@gmail.com) (S.A.) and [mohammad.fayyaz@uos.edu.pk](mailto:mohammad.fayyaz@uos.edu.pk) (M.F.R.).

<sup>b</sup> Department of Chemistry, Division of Science and Technology, University of Education, Lahore-54770 (Pakistan) E-Mail: [laila.rubab@ue.edu.pk](mailto:laila.rubab@ue.edu.pk) (S.L.R.).

\* Corresponding author: [rauf.raza@uos.edu.pk](mailto:rauf.raza@uos.edu.pk) (A.R.R.), [mohammad.fayyaz@uos.edu.pk](mailto:mohammad.fayyaz@uos.edu.pk) (M.F.R.); Tel.: +92-48-9230-546 (A.R.R. and M.F.R.)

†Electronic Supplementary Information (ESI) available: [details of any supplementary information available should be included here]. See DOI: 10.1039/x0xx00000x

## ARTICLE

**Table S1:** Binding energies (kcal/mol units), dissociation constant (nanomolar units) and active sites of targeted indole amines (19-34) through *in silico* study.

| Indole Amine | B.E.   | D.C.   | Active Site                                                                                                                                                                               |
|--------------|--------|--------|-------------------------------------------------------------------------------------------------------------------------------------------------------------------------------------------|
| 25           | -13.37 | 0.158  | Tyr72, Asp74, Trp86, Gly121, Trp286, Leu289, Glu292, Val294, Phe295, Phe297, Tyr337, Phe338, Tyr341                                                                                       |
| 26           | -12.81 | 0.4    | Tyr72, Asp74, Gly121, Gly122, Tyr124, Trp286, Leu289, Glu292, Ser293, Val294, Phe295, Arg296, Tyr337, Phe338, Tyr341                                                                      |
| 24           | -12.43 | 0.769  | Tyr72, Asp74, Gly121, Ser125, Trp286, Leu289, Glu292, Ser293, Val294, Phe295, Phe297, Tyr337, Phe338, Tyr341                                                                              |
| 22           | -12.39 | 0.83   | Tyr72, Asp74, Leu76, Tyr124, Trp286, Glu292, Ser293, Val294, Phe295, Phe297, Phe338, Tyr341                                                                                               |
| 21           | -12.34 | 0.903  | Tyr72, Asp74, Trp86, Gly121, Gly122, Tyr124, Ser125, Trp286, His287, Leu289, Gln291, Glu292, Ser293, Val294, Phe295, Arg296, Phe297, Tyr337, Phe338, Tyr341                               |
| 20           | -12.19 | 1.17   | (Tyr72, Asp74, Thr75, Leu76, Tyr77, Thr83, Tyr124, Ser125, Trp286, Leu289, Gln291, Glu292, Ser293, Val294, Phe295, Arg296, Phe297, Tyr337, Phe338, Tyr341, Gly342                         |
| 19           | -11.67 | 2.81   | Tyr72, Asp74, Gly121, Gly122, Tyr124, Ser125, Trp286, His287, Leu289, Gln291, Glu292, Ser293, Val294, Phe295, Arg296, Phe297, Tyr337, Phe338, Tyr341                                      |
| 23           | -11.67 | 2.81   | Tyr72, Asp74, Gly121, Gly122, Tyr124, Ser125, Trp286, His287, Leu289, Gln291, Glu292, Ser293, Val294, Phe295, Arg296, Phe297, Tyr337, Phe338, Tyr341                                      |
| 33           | -10.3  | 28.02  | Tyr72, Asp74, Thr75, Leu76, Tyr77, Thr83, Trp286, Leu289, Ser293, Val294, Phe295, Arg296, Phe297, Tyr337, Phe338, Tyr341                                                                  |
| 30           | -10.21 | 32.58  | Tyr72, Asp74, Trp86, Gly121, Gly122, Ser125, Ser203, Phe295, Phe297, Tyr337, Phe338, Tyr341, His447                                                                                       |
| 34           | -9.93  | 52.58  | Tyr72, Asp74, Gly121, Gly122, Ser203, Trp286, Ser293, Val294, Phe295, Arg296, Phe297, Asp333, Tyr337, Phe338, Tyr341, His447                                                              |
| 29           | -9.85  | 60.13  | Tyr72, Asp74, Thr83, Trp86, Gly121, Gly122, Ser125, Ser203, Ala204, Trp236, Trp286, Leu289, Ser293, Val294, Phe295, Arg296, Phe297, Tyr337, Phe338, Tyr341, His447                        |
| 32           | -9.57  | 97.32  | Gln71, Tyr72, Asp74, Trp86, Asn87, Gly120, Gly121, Gly122, Ser125, Gly126, Leu130, Ser203, Trp286, Leu289, Ser293, Val294, Phe295, Arg296, Phe297, Tyr337, Phe338, Tyr341, His447, Gly448 |
| 28           | -9.14  | 198.53 | (Chain B) Tyr72, Asp74, Thr75, Leu76, Trp86, Gly120, Gly121, Gly122, Ser125, Glu202, Trp286, Val294, Phe295, Arg296, Phe297, Tyr337, Phe338, Tyr341, His447, Gly448                       |
| 27           | -8.72  | 405.14 | (Chain B) Tyr72, Asp74, Gly121, Gly122, Tyr124, Ser125, Trp286, Ser293, Val294, Phe295, Arg296, Phe297, Tyr337, Phe338, Tyr341                                                            |

**Table S2:** Selected crystallographic data of *N*-phenyl (4,5,6-trimethoxy-2,3-diphenyl-1*H*-indol-7-yl) methanimine.

| Important crystallographic parameters of imine  |                                                               |
|-------------------------------------------------|---------------------------------------------------------------|
| Molecular Formula                               | C <sub>30</sub> H <sub>26</sub> N <sub>2</sub> O <sub>3</sub> |
| Molecular mass [amu]                            | 462.53                                                        |
| Crystal System                                  | Triclinic                                                     |
| a, b, c [Å]                                     | 6.7431(13), 10.7860(19), 17.370(3)                            |
| α, β, γ [°]                                     | 94.936(10), 92.093(11), 98.257(11)                            |
| Volume of crystal [Å <sup>3</sup> ]             | 1244.1(4)                                                     |
| Z                                               | 2                                                             |
| Density of crystal (calc.) [g/cm <sup>3</sup> ] | 1.235                                                         |
| μ (MoKa) [ /mm]                                 | 0.080                                                         |
| F (000)                                         | 488                                                           |

| Bond Angles (°)                                   |        | Bond Distances (Å)               |        |
|---------------------------------------------------|--------|----------------------------------|--------|
| C <sup>20</sup> -O <sup>1</sup> -C <sup>21</sup>  | 117.52 | O <sup>1</sup> -C <sup>20</sup>  | 1.3648 |
| C <sup>9</sup> -C <sup>14</sup> -C <sup>13</sup>  | 121.25 | O <sup>1</sup> -C <sup>21</sup>  | 1.4394 |
| C <sup>7</sup> -N <sup>1</sup> -C <sup>16</sup>   | 108.17 | C <sup>17</sup> -C <sup>18</sup> | 1.3959 |
| C <sup>24</sup> -N <sup>2</sup> -C <sup>25</sup>  | 116.44 | C <sup>17</sup> -C <sup>18</sup> | 1.3959 |
| N <sup>1</sup> -C <sup>16</sup> -C <sup>17</sup>  | 127.55 | N <sup>1</sup> -C <sup>7</sup>   | 1.3936 |
| C <sup>7</sup> -N <sup>1</sup> -H <sup>1A</sup>   | 126.00 | N <sup>1</sup> -C <sup>16</sup>  | 1.3684 |
| N <sup>1</sup> -C <sup>16</sup> -C <sup>15</sup>  | 108.51 | N <sup>2</sup> -C <sup>24</sup>  | 1.2981 |
| C <sup>15</sup> -C <sup>16</sup> -C <sup>17</sup> | 123.92 | N <sup>2</sup> -C <sup>25</sup>  | 1.4234 |
| C <sup>17</sup> -C <sup>18</sup> -C <sup>19</sup> | 122.42 | N <sup>1</sup> -H <sup>1A</sup>  | 0.8600 |
| C <sup>5</sup> -C <sup>6</sup> -C <sup>7</sup>    | 119.63 | C <sup>25</sup> -C <sup>26</sup> | 1.3746 |

**Table S3:** Selected crystallographic data of 4,5,6-trimethoxy-2,3-diphenyl-7-phenylaminomethyl-1*H*-indole.

| Important crystallographic parameters of indole amine |                                                               |
|-------------------------------------------------------|---------------------------------------------------------------|
| Molecular Formula                                     | C <sub>30</sub> H <sub>28</sub> N <sub>2</sub> O <sub>3</sub> |
| Molecular mass [amu]                                  | 464.54                                                        |
| Crystal System                                        | Monoclinic                                                    |
| a, b, c [Å]                                           | 9.5472(6), 11.8512(8), 21.3627(17)                            |
| α, β, γ [°]                                           | 90, 94.605(4), 90                                             |
| Volume of crystal [Å <sup>3</sup> ]                   | 2409.3(3)                                                     |
| Z                                                     | 4                                                             |
| Density of crystal (calc.) [g/cm <sup>3</sup> ]       | 1.281                                                         |
| μ (MoKa) [/mm]                                        | 0.083                                                         |
| F (000)                                               | 984                                                           |

  

| Bond Angles (°)                                   |        | Bond Distances (Å)               |        |
|---------------------------------------------------|--------|----------------------------------|--------|
| C <sup>20</sup> -O <sup>1</sup> -C <sup>21</sup>  | 117.52 | O <sup>1</sup> -C <sup>20</sup>  | 1.3802 |
| C <sup>9</sup> -C <sup>14</sup> -C <sup>13</sup>  | 121.25 | O <sup>1</sup> -C <sup>21</sup>  | 1.4258 |
| C <sup>7</sup> -N <sup>1</sup> -C <sup>16</sup>   | 108.17 | C <sup>17</sup> -C <sup>18</sup> | 1.3781 |
| C <sup>24</sup> -N <sup>2</sup> -C <sup>25</sup>  | 116.44 | C <sup>15</sup> -C <sup>16</sup> | 1.4031 |
| N <sup>1</sup> -C <sup>16</sup> -C <sup>17</sup>  | 127.55 | N <sup>1</sup> -C <sup>7</sup>   | 1.3904 |
| C <sup>7</sup> -N <sup>1</sup> -H <sup>1A</sup>   | 126.00 | N <sup>1</sup> -C <sup>16</sup>  | 1.3634 |
| N <sup>1</sup> -C <sup>16</sup> -C <sup>15</sup>  | 108.51 | N <sup>2</sup> -C <sup>24</sup>  | 1.4416 |
| C <sup>15</sup> -C <sup>16</sup> -C <sup>17</sup> | 123.92 | N <sup>2</sup> -C <sup>25</sup>  | 1.4198 |
| C <sup>17</sup> -C <sup>18</sup> -C <sup>19</sup> | 122.42 | N <sup>1</sup> -H <sup>1A</sup>  | 0.8800 |
| C <sup>5</sup> -C <sup>6</sup> -C <sup>7</sup>    | 119.63 | N <sup>2</sup> -H <sup>2A</sup>  | 1.2100 |

**Table S4:** ADMET parameters of the 2,3-diphenylindole amines.

| Indole amines                    | 25     | 24     | 21     | 20     |
|----------------------------------|--------|--------|--------|--------|
| <i>Physiochemical Properties</i> |        |        |        |        |
| MW*                              | 509.55 | 509.55 | 479.53 | 479.53 |
| NRB <sup>Δ</sup>                 | 9      | 9      | 8      | 8      |
| HBA <sup>+</sup>                 | 5      | 5      | 4      | 4      |
| HBD <sup>++</sup>                | 2      | 2      | 2      | 2      |
| LogP                             | 5.20   | 5.17   | 5.16   | 5.17   |
| TPSA <sup>1</sup>                | 101.33 | 101.33 | 92.10  | 92.10  |

| ARTICLE                                                | Journal Name   |                |                |                |
|--------------------------------------------------------|----------------|----------------|----------------|----------------|
| MR <sup>2</sup>                                        | 151.26         | 151.26         | 144.77         | 144.77         |
| Log S                                                  | -7.06          | -7.06          | -6.99          | -6.99          |
|                                                        | Poorly soluble | Poorly soluble | Poorly soluble | Poorly soluble |
| <b>Adsorption</b>                                      |                |                |                |                |
| Water solubility (log mol/L)                           | -3.479         | -3.471         | -3.967         | -3.944         |
| Caco2 permeability (log Papp in 10 <sup>-6</sup> cm/s) | 0.621          | 0.613          | 0.568          | 0.554          |
| Intestinal absorption (human) (% Absorbed)             | 100            | 100            | 91.784         | 93.464         |
| Skin Permeability (log Kp)                             | -2.735         | -2.735         | -2.735         | -2.735         |
| P-glycoprotein substrate                               | Yes            | Yes            | Yes            | Yes            |
| P-glycoprotein I inhibitor                             | Yes            | Yes            | Yes            | Yes            |
| P-glycoprotein II inhibitor                            | Yes            | Yes            | Yes            | Yes            |
| <b>Distribution</b>                                    |                |                |                |                |
| VDs <sup>a</sup> (human) (log L/kg)                    | -1.585         | -1.587         | -1.487         | -1.491         |
| Fraction unbound (human)                               | 0.312          | 0.314          | 0.283          | 0.285          |
| BBB <sup>b</sup> permeability (log BB)                 | -0.1 (No)      | -0.117 (No)    | 0.037 (No)     | 0.02 (No)      |
| CNS <sup>c</sup> permeability (log PS)                 | -1.935         | -1.919         | -1.71          | -1.699         |
| <b>Metabolism</b>                                      |                |                |                |                |
| CYP2D6 substrate                                       | No             | No             | No             | No             |
| CYP3A4 substrate                                       | Yes            | Yes            | Yes            | Yes            |
| CYP1A2 inhibitor                                       | Yes            | Yes            | Yes            | Yes            |
| CYP2C19 inhibitor                                      | Yes            | Yes            | Yes            | Yes            |
| CYP2C9 inhibitor                                       | Yes            | Yes            | Yes            | Yes            |
| CYP2D6 inhibitor                                       | No             | No             | No             | No             |
| CYP3A4 inhibitor                                       | No             | No             | No             | No             |
| <b>Excretion</b>                                       |                |                |                |                |
| Total Clearance (log ml/min/kg)                        | 0.62           | 0.627          | 0.68           | 0.688          |
| Renal OCT2 substrate                                   | No             | No             | No             | No             |
| <b>Toxicity</b>                                        |                |                |                |                |
| AMES toxicity                                          | Yes            | Yes            | Yes            | Yes            |
| Max. tolerated dose (human) (log mg/kg/day)            | 0.436          | 0.438          | 0.474          | 0.475          |
| hERG I inhibitor                                       | No             | No             | No             | No             |
| hERG II inhibitor                                      | Yes            | Yes            | Yes            | Yes            |
| Oral Rat Acute Toxicity (LD50) (mol/kg)                | 2.934          | 2.933          | 3.145          | 3.146          |
| Oral Rat Chronic Toxicity (LOAEL) (log mg/kg_bw/day)   | 1.582          | 1.364          | 1.805          | 1.6            |
| Hepatotoxicity                                         | Yes            | Yes            | Yes            | Yes            |
| Skin Sensitisation                                     | No             | No             | No             | No             |
| T.Pyriformis toxicity (log ug/L)                       | 0.285          | 0.285          | 0.285          | 0.285          |
| Minnow toxicity (log mM)                               | -3.944         | -3.745         | -2.877         | -2.694         |

<sup>a</sup>Molecular weight (g/mol), <sup>b</sup>Non-rotatable bond, <sup>c</sup>Hydrogen bond acceptor, <sup>+</sup>Hydrogen bond doner, <sup>1</sup>Topological Polar Surface Area (Å<sup>2</sup>), <sup>2</sup>Molar refractivity, <sup>a</sup>Volume of Distribution, <sup>b</sup>BBB (Blood-brain Barrier), <sup>c</sup>CNS (Central Nervous System)

26

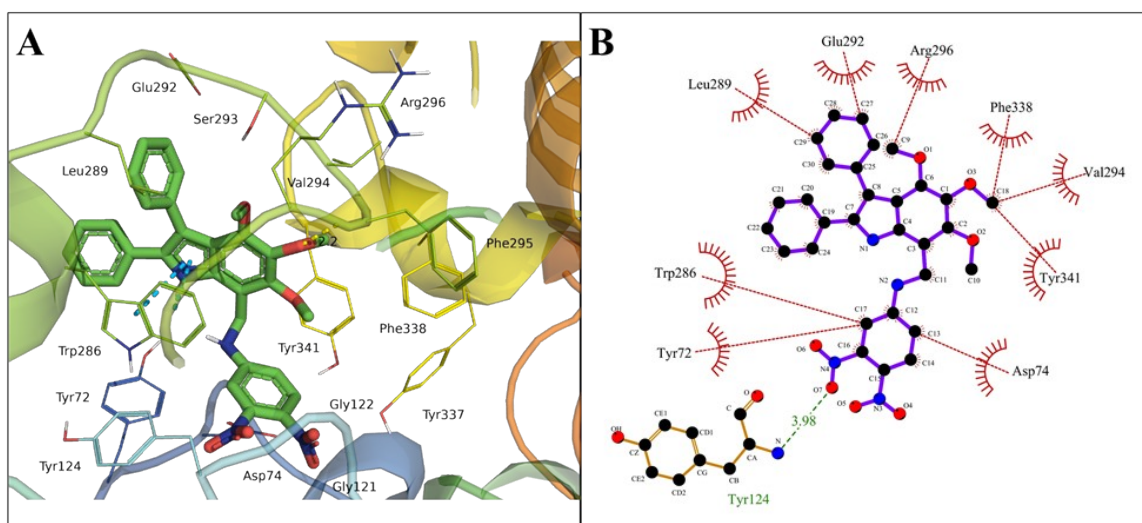

27

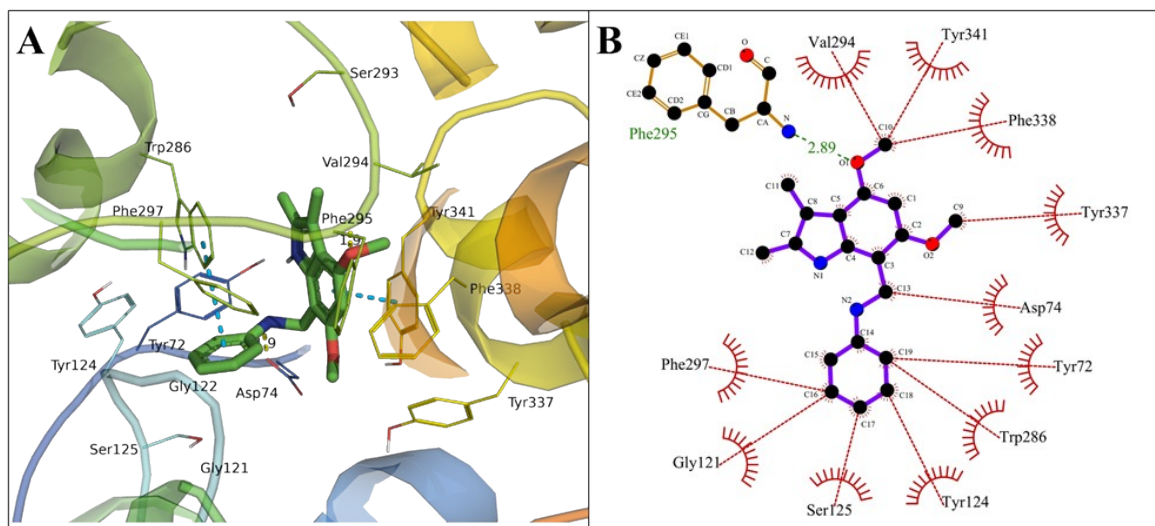

28

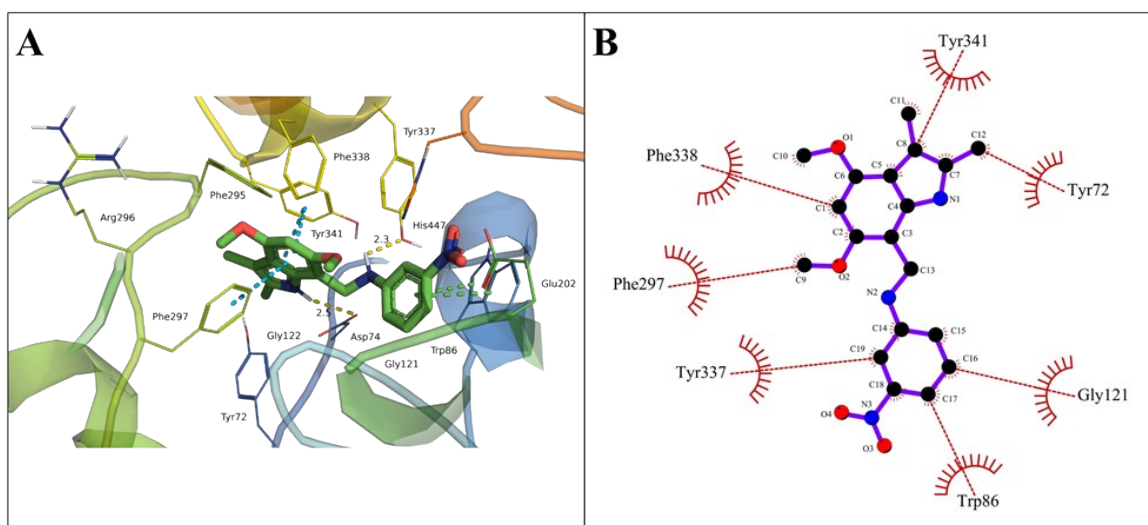

**Figure S1:** Binding mode with AChE (4M0E). **A:** 3D interaction of key residues of 4M0E, where pi-pi stacking (blue dotted line), hydrogen bond (yellow dotted line) and pi-cation (green dotted line) are represented. **B:** 2D interaction of key residues of 4M0E, where hydrophobic interactions (red lines) and hydrogen bond (green lines) are represented.

29

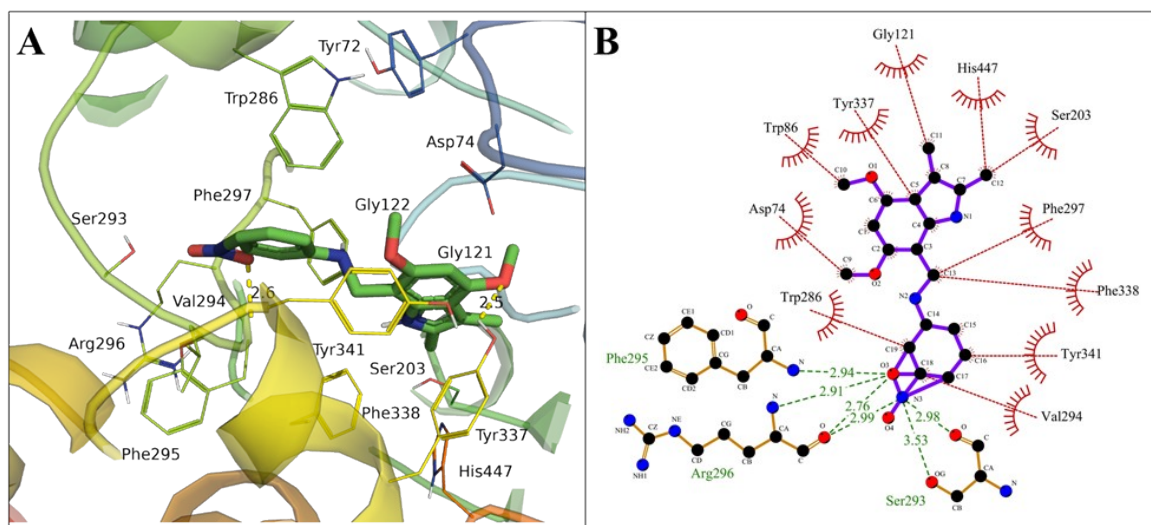

30

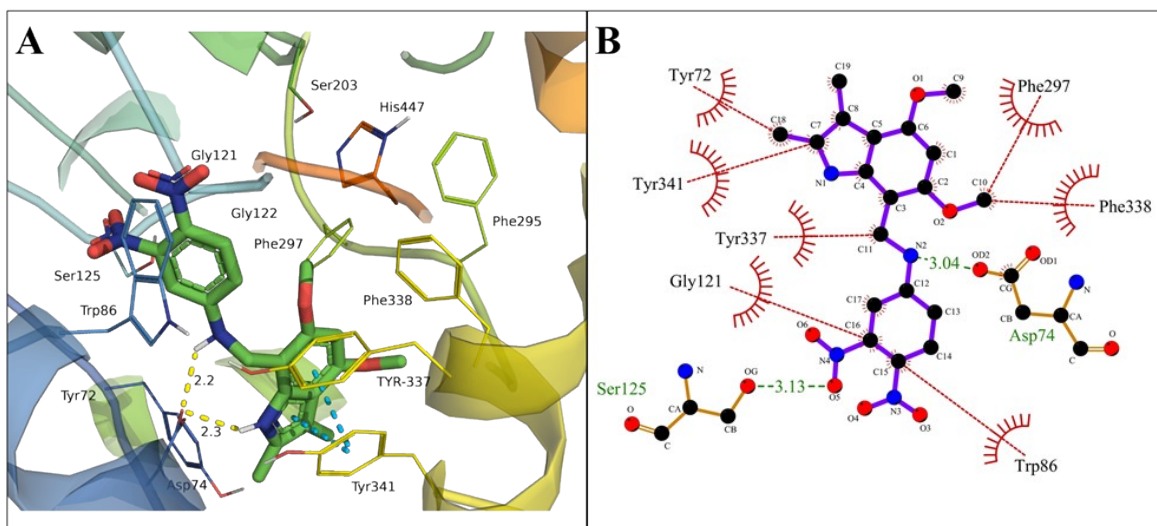

32

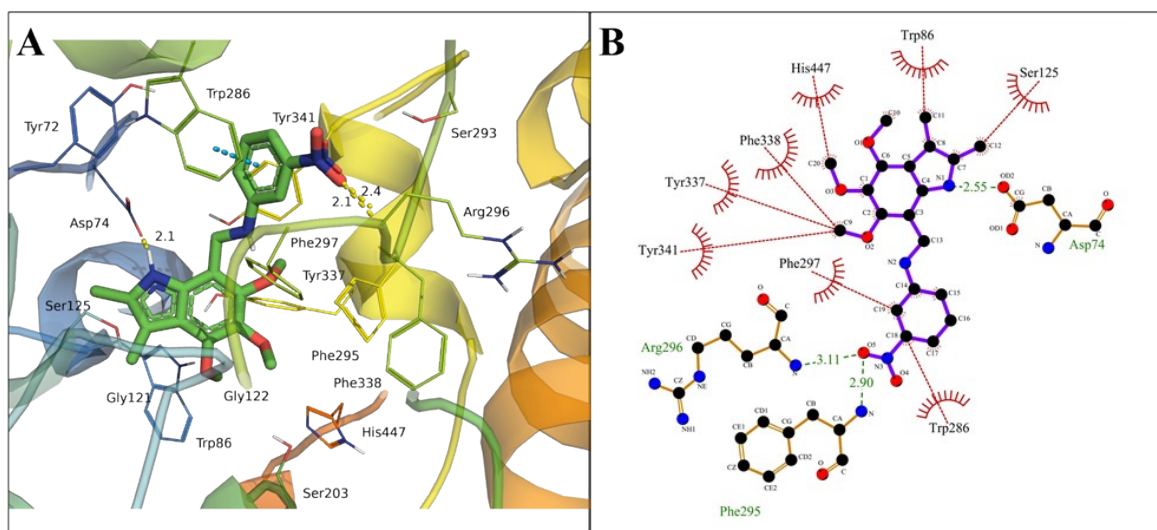

**Figure S2:** Binding mode with AChE (4M0E). **A:** 3D interaction of key residues of 4M0E, where pi-pi stacking (blue dotted line), hydrogen bond (yellow dotted line) and pi-cation (green dotted line) are represented. **B:** 2D interaction of key residues of 4M0E, where hydrophobic interactions (red lines) and hydrogen bond (green lines) are represented.

33

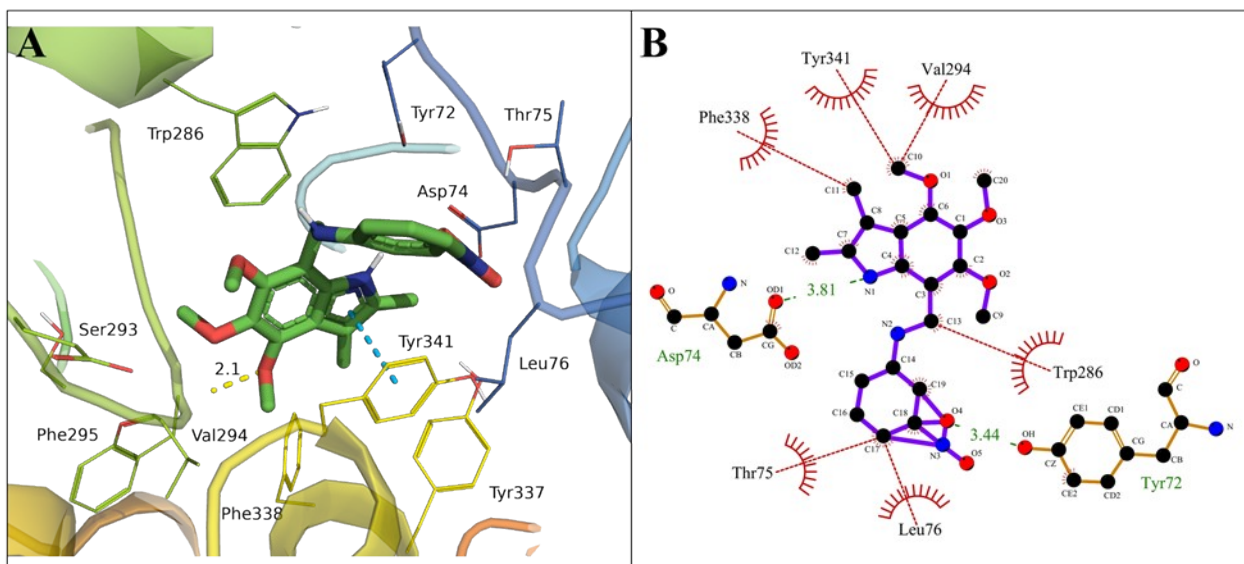

34

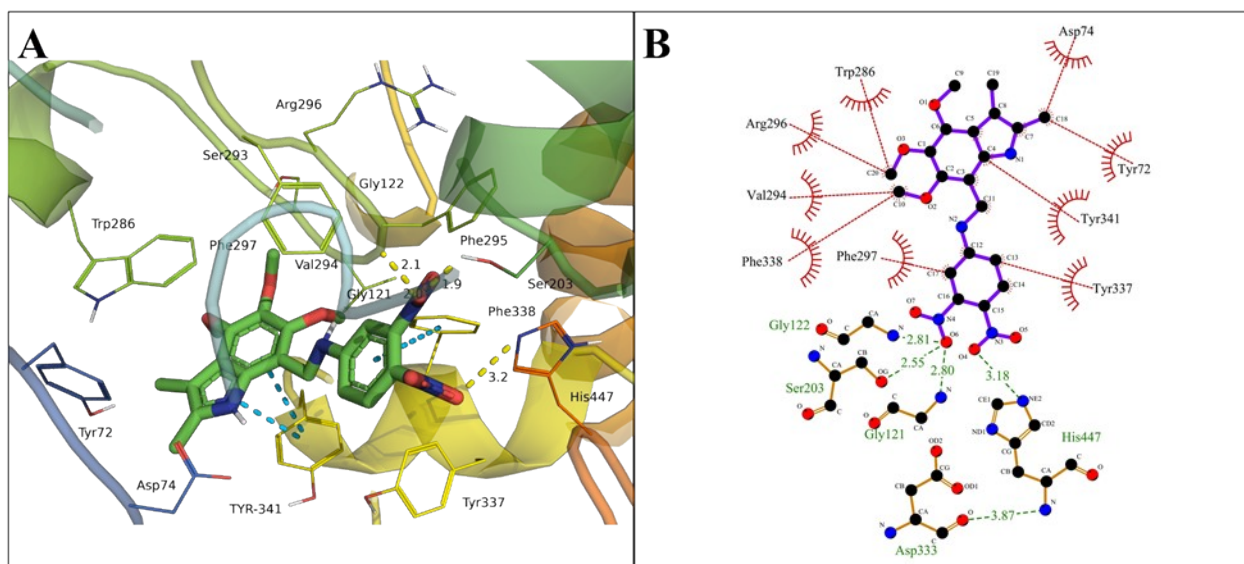

**Figure S3:** Binding mode with AChE (4M0E). **A:** 3D interaction of key residues of 4M0E, where pi-pi stacking (blue dotted line), hydrogen bond (yellow dotted line) and pi-cation (green dotted line) are represented. **B:** 2D interaction of key residues of 4M0E, where hydrophobic interactions (red lines) and hydrogen bond (green lines) are represented.
